# Supplementary material for: Bald thigh syndrome in sighthounds—Revisiting the cause of a well-known disease
Source: PLoS One. 2019 Feb 22;14(2):e0212645. doi: 10.1371/journal.pone.0212645 (PMC6386255; doi:10.1371/journal.pone.0212645)
Supplement: S6 Table — ID, gene identifier of the Entrez Gene database of NCBI; Log2FC, log2 fold change; FDR, false discovery rate, refers to Benjamini-Hochberg adjusted p- value; IRS, inner root sheath; HF, hair follicle; ORS, outer root sheath; DP, dermal papilla. [50, 52–55, 65, 66, 72–83]. (XLSX) [file pone.0212645.s007.xlsx]

## Sheet: Sheet1
Gene symbol	Full name	BaseMean	Log2 FC	lfcSE	stat	pvalue	FDR	Expression	Hair disorder	Reference
S100A3	S100 calcium binding protein A3	3817.87	-2.17296	0.22074	-9.84398	7.2774e-23	5.17899e-20	endocuticle, cortex	age-dependent damage of the hair cuticle	1) Takizawa, T., et al. (1999) Journal of Histochemistry and Cytochemistry 2) Kizawa, K., et al. (2002) Biochemical and Biophysical Research Communications
TCHH	trichohyalin	21384.7	-1.60605	0.22068	-7.27773	3.39496e-13	7.5683e-11	IRS	umcombable hair syndrome	3) FB, U. B., et al. (2016) American Journal of Human Genetics
DSG4	desmoglein 4	1094.49	-1.56767	0.224741	-6.97546	3.04879e-12	6.06577e-10	cortex, cuticle	monilethrix	4) Farooq, M., et al. (2011) Br J Dermatol. 5) Kljuic, A., et al. (2003) Cell 6) Bazzi, H., et al. (2009) Differentiation
TCHHL1	trichohyalin like 1	448.78	-1.43282	0.232456	-6.16384	7.10006e-10	1.19429e-07	distal IRS		7) Yamakoshi, T., et al. (2013) Biochemical and Biophysical Research Communications
PRSS53	protease, serine 53	602.466	-1.32642	0.22423	-5.91543	3.31011e-09	5.23478e-07	IRS (cornified), medulla	locus associated with influencing hair shape in Latin Americans	8) Adhikari, K., et al. (2016) Nature Communications
PADI3	peptidyl arginine deiminase 3	1632.97	-1.25754	0.237111	-5.30359	1.13546e-07	1.47374e-05	IRS, medulla	umcombable hair syndrome	3) FB, U. B., et al. (2016). American Journal of Human Genetics.
MSX2	msh homeobox 2	407.321	-1.17617	0.189788	-6.19725	5.74595e-10	9.75388e-08	matrix cells of HF, cortex	cyclic alopecia	9) Ma, L., et al. (2003). Development 10) Cai, J., et al. (2009). Developmental Biology
HOXC13	homeobox C13	947.479	-1.16101	0.186099	-6.2387	4.41211e-10	7.62966e-08	cortex, medulla, ORS	brittle hair resulting in alopecia (mice)	11) Godwin, A. R. and M. R. Capecchi (1998).Genes Development 12) Lin Z et al.(2012). American Journal of Human Genetics 13) Tkatchenko, A. V., et al. (2001). Development
FOXN1	forkhead box N1	933.128	-1.15122	0.173882	-6.6207	3.57514e-11	6.61508e-09	postmitotic precursors of the differentiating hair shaft and IRS	nude mice	14) Abitbol, M., et al. (2015). PloS one 15) Johns, S. A., et al. (2005). Developmental Dynamics
DLX3	distal-less homeobox 3	1353.53	-0.933045	0.175946	-5.30303	1.13898e-07	1.47374e-05	hair follicle matrix, anagen: IRS, medulla, cortex, cuticle	autosomal dominant ectodermal dysplasia (trichodenoosseus syndrome)	16) Hwang, J., et al. (2008) Development
LEF1	lymphocyte enhancement factor 1	499.897	-0.8472				0.00517852	progenitor cells of the HF		17) Merrill, B. J., et al. (2001) Genes & Development
BMP4	bone morphogenetic protein 4	810.545	-0.69029				0.0232264	DP, ORS, IRS, precortex		10) Cai, J., et al. (2009) Developmental Biology. 18) Kulessa, H., et al. (2000)The EMBO journal 19) Guha, U., et al. (2004) The American Journal of Pathology
BMP2	bone morphogenetic protein 2	344.747	-0.652167				0.00139261	ORS, matrix cells		19) Guha, U., et al. (2004) The American Journal of Pathology.
DSC2	desmocollin 2	2772.27	-0.523995				0.0301396	medulla		15) Johns, S. A., et al. (2005) Developmental Dynamics
